# Supplementary material for: Genetic determinants of centenarian longevity, as quantified by the 'CentPGS' score, are associated with a lower risk of multiple age-related diseases and a longer healthspan.
Source: Research Square preprint supplement (doi:10.21203/rs.3.rs-3916561/v1), 2024-04-09
Supplement: Supplementary file 1 [file 2972675ada11c99f6c733938.ai]

|         |        |   |       |       |       |       |
|---------|--------|---|-------|-------|-------|-------|
| mean:   | -0.374 | 0 | 0.292 | 1.053 | 1.794 | 3.413 |
| median: | -0.341 | 0 | 0.289 | 1.031 | 1.387 | 3.427 |

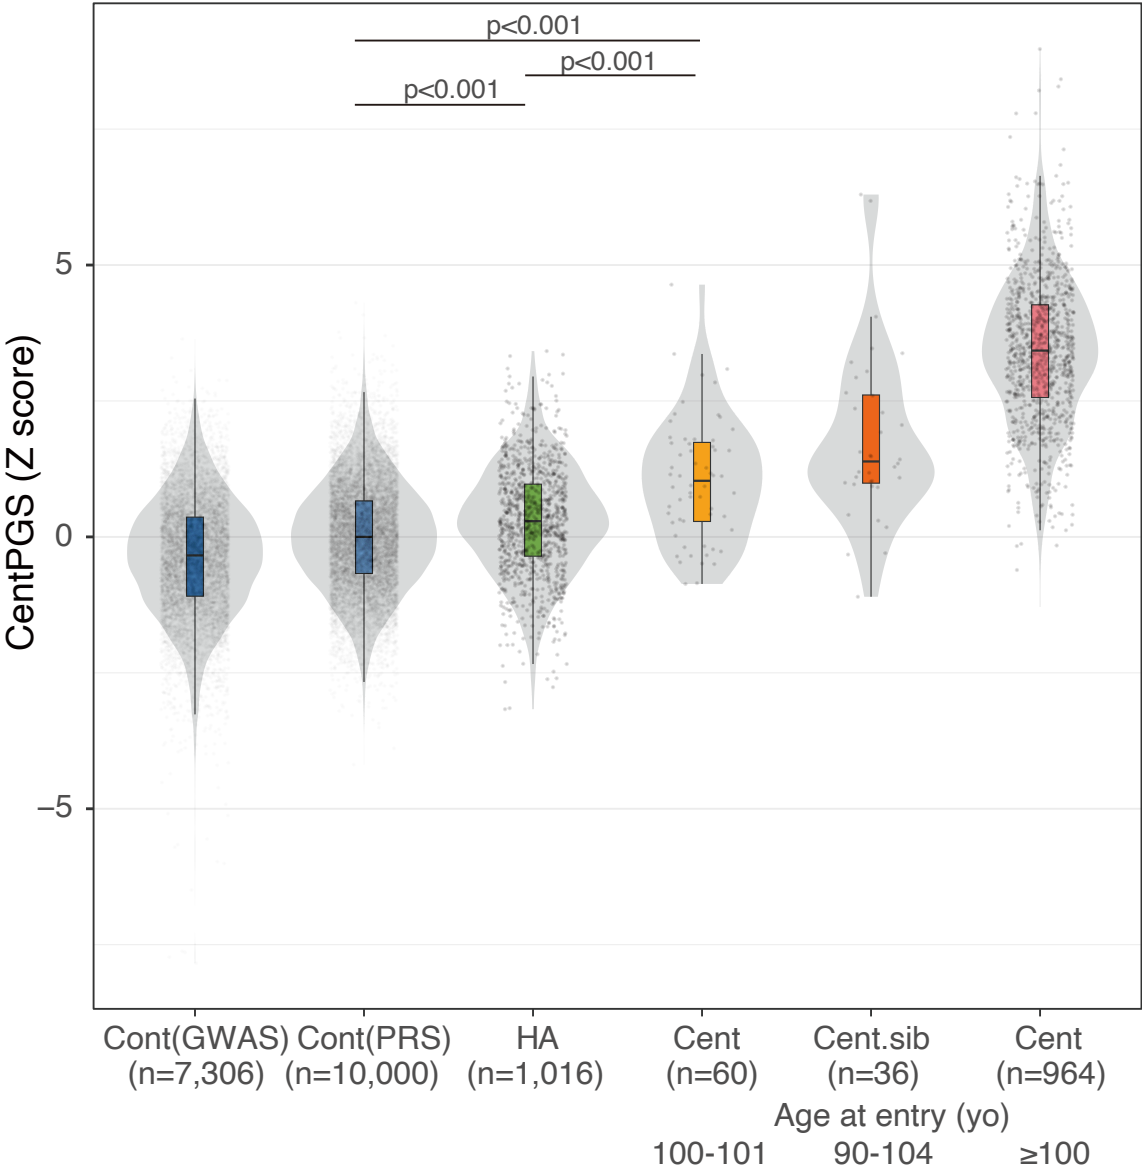

Supplementary Fig.4  
 Disribution of CentPGS in Controls, HA, and Centenarians.

A total of 53,760 SNVs with  $p < 0.01$  were extracted from the centenarian GWAS summary statistic data, and the Z-scored CentPGS against Cont(PRS) was calculated for each individual using PRS-CS. Note that Cent.PGS would be overestimated for both Cent and Cont(GWAS) would be overestimated because these are the the samples that are used to calculate the Centenarian GWAS summary statistics. Differences in the distribution of PGS values were assessed by the Wilcoxon rank sum test.
